# Supplementary material
Source: PubMed Central journal article supplement (PMC2084315)

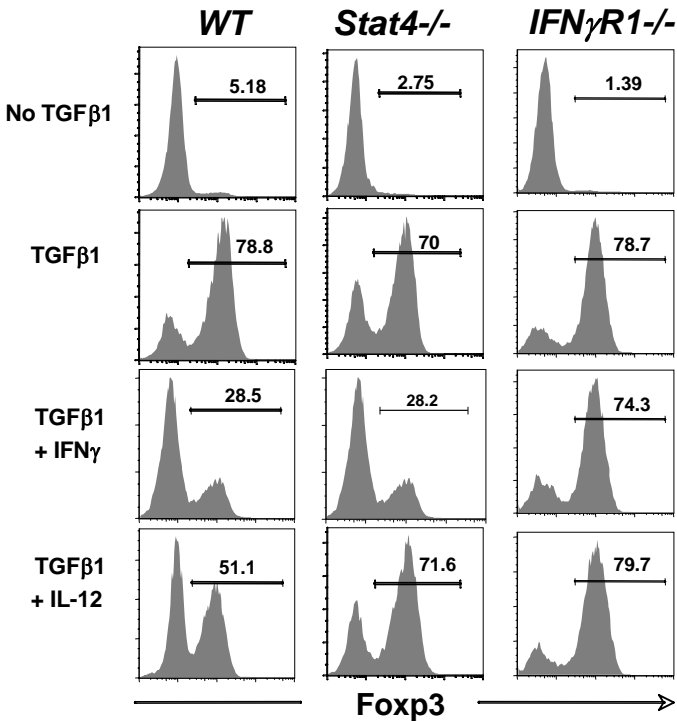

Supplement: pnas_0703642104_5.pdf [file pnas_0703642104_5.pdf]
